# Supplementary material for: Culture-induced recurrent epigenetic aberrations in human pluripotent stem cells
Source: PLoS Genet. 2017 Aug 24;13(8):e1006979. doi: 10.1371/journal.pgen.1006979 (PMC5587343; doi:10.1371/journal.pgen.1006979)
Supplement: S1 File — (XLSX) [file pgen.1006979.s010.xlsx]

## Sheet: Nazor et al Expression and 27k
Study	Expression	Methylation	Description	Passage	Gender
GSE30654	GSM760080	GSM760330	iPS_HDF51IPS6_passage5_____Female_157	5	Female
GSE30654	GSM760081	GSM760331	iPS_HDF51IPS7_passage5_____Female_158	5	Female
GSE30654	GSM760072	GSM760322	iPS_HDF51IPS10_passage6_____Female_161	6	Female
GSE30654	GSM760074	GSM760324	iPS_HDF51IPS12_passage6_____Female_163	6	Female
GSE30654	GSM760076	GSM760326	iPS_HDF51IPS1_passage6_____Female_153	6	Female
GSE30654	GSM760077	GSM760327	iPS_HDF51IPS2_passage6_____Female_154	6	Female
GSE30654	GSM760078	GSM760328	iPS_HDF51IPS3_passage6_____Female_155	6	Female
GSE30654	GSM760079	GSM760329	iPS_HDF51IPS5_passage6_____Female_156	6	Female
GSE30654	GSM760082	GSM760332	iPS_HDF51IPS9_passage7_____Female_160	7	Female
GSE30654	GSM760073	GSM760323	iPS_HDF51IPS11_passage8_____Female_162	8	Female
GSE30654	GSM760075	GSM760325	iPS_HDF51IPS13_passage8_____Female_164	8	Female
GSE30654	GSM760022	GSM760265	ES_SIVF049_passage9_____Female_279	9	Female
GSE30654	GSM760071	GSM760321	ES_SIVF050_passage9_____Male_280	9	Male
GSE30654	GSM760021	GSM760264	ES_SIVF047_passage10_____Female_288	10	Female
GSE30654	GSM760020	GSM760263	ES_SIVF046_passage11_____Female_287	11	Female
GSE30654	GSM759973	GSM760212	ES_CM8_passage12_____Female_241	12	Female
GSE30654	GSM760067	GSM760317	ES_SIVF043_passage12_____Male_284	12	Male
GSE30654	GSM759990	GSM760231	ES_MEL2_passage13_____Female_36	13	Female
GSE30654	GSM760019	GSM760262	ES_SIVF042_passage13_____Female_283	13	Female
GSE30654	GSM760068	GSM760318	ES_SIVF044_passage13_____Male_285	13	Male
GSE30654	GSM760069	GSM760319	ES_SIVF045_passage13_____Male_286	13	Male
GSE30654	GSM760094	GSM760333	iPS_GOTTESFELD3816.5_passage14_____Female_300	14	Female
GSE30654	GSM759991	GSM760232	ES_MEL2_passage15_____Female_36	15	Female
GSE30654	GSM760012	GSM760255	ES_SIVF024_passage15_____Female_294	15	Female
GSE30654	GSM759969	GSM760208	ES_CM1_passage16_____Female_246	16	Female
GSE30654	GSM759966	GSM760205	ES_CM11_passage17_____Female_240	17	Female
GSE30654	GSM759970	GSM760209	ES_CM2_passage17_____Female_245	17	Female
GSE30654	GSM760017	GSM760260	ES_SIVF040_passage17_____Female_281	17	Female
GSE30654	GSM760018	GSM760261	ES_SIVF041_passage17_____Female_282	17	Female
GSE30654	GSM760053	GSM760303	ES_SIVF002_passage17_____Male_136	17	Male
GSE30654	GSM760101	GSM760345	iPS_IPS-Foreskin-CL2_passage17_____Male_131	17	Male
GSE30654	GSM759997	GSM760239	ES_SIVF001_passage18_____Female_112	18	Female
GSE30654	GSM760058	GSM760308	ES_SIVF015_passage18_____Male_274	18	Male
GSE30654	GSM760100	GSM760344	iPS_IPS-Foreskin-CL1_passage18_____Male_130	18	Male
GSE30654	GSM760103	GSM760347	iPS_IPS-Foreskin-CL4_passage18_____Male_133	18	Male
GSE30654	GSM759971	GSM760210	ES_CM6_passage19_____Female_244	19	Female
GSE30654	GSM759972	GSM760211	ES_CM7_passage19_____Female_243	19	Female
GSE30654	GSM760005	GSM760248	ES_SIVF016_passage19_____Female_275	19	Female
GSE30654	GSM760102	GSM760346	iPS_IPS-Foreskin-CL3_passage19_____Male_132	19	Male
GSE30654	GSM760105	GSM760349	iPS_GOTTESFELD4078.1B3_passage20_____Male_301	20	Male
GSE30654	GSM759967	GSM760206	ES_CM14_passage21_____Female_239	21	Female
GSE30654	GSM760003	GSM760246	ES_SIVF007_passage21_____Female_115	21	Female
GSE30654	GSM760044	GSM760292	ES_HUES16_passage21_____Male_70	21	Male
GSE30654	GSM760001	GSM760244	ES_SIVF006_passage22_____Female_114	22	Female
GSE30654	GSM760004	GSM760247	ES_SIVF007_passage23_____Female_115	23	Female
GSE30654	GSM760109	GSM760353	iPS_NSC253I_passage23_____Male_314	23	Male
GSE30654	GSM759977	GSM760216	ES_ESI017_passage24_____Female_26	24	Female
GSE30654	GSM760002	GSM760245	ES_SIVF006_passage24_____Female_114	24	Female
GSE30654	GSM759974	GSM760213	ES_CM8_passage25_____Female_241	25	Female
GSE30654	GSM760117	GSM760361	iPS_HDF51IPS1_passage25_____Female_153	25	Female
GSE30654	GSM760054	GSM760304	ES_SIVF002_passage50_____Male_290	50	Male
GSE30654	GSM760045	GSM760293	ES_MEL1_passage51_____Male_35	51	Male
GSE30654	GSM760010	GSM760253	ES_SIVF020_passage52_____Female_119	52	Female
GSE30654	GSM760048	GSM760296	ES_MIZ4_passage53_____Male_37	53	Male
GSE30654	GSM759988	GSM760229	ES_HES3_passage54_____Female_33	54	Female
GSE30654	GSM759965	GSM760204	ES_BG03_passage55_____Female_124	55	Female
GSE30654	GSM759984	GSM760225	ES_HES2_passage55_____Female_32	55	Female
GSE30654	GSM760028	GSM760273	ES_WA07_passage56_____Female_47	56	Female
GSE30654	GSM760041	GSM760289	ES_HES4_passage56_____Male_34	56	Male
GSE30654	GSM760042	GSM760290	ES_HES4_passage57_____Male_34	57	Male
GSE30654	GSM759989	GSM760230	ES_HES3_passage59_____Female_33	59	Female
GSE30654	GSM760046	GSM760294	ES_MEL1_passage59_____Male_35	59	Male
GSE30654	GSM760043	GSM760291	ES_HES4_passage60_____Male_34	60	Male
GSE30654	GSM760023	GSM760267	ES_UC06_passage61_____Female_39	61	Female
GSE30654	GSM760050	GSM760299	ES_MIZ4_passage62_____Male_37	62	Male
GSE30654	GSM760051	GSM760301	ES_MIZ4_passage63_____Male_37	63	Male
GSE30654	GSM760052	GSM760302	ES_MIZ4_passage65_____Male_37	65	Male
GSE30654	GSM760008	GSM760251	ES_SIVF019_passage67_____Female_118	67	Female
GSE30654	GSM760060	GSM760310	ES_SIVF017_passage67_____Male_292	67	Male
GSE30654	GSM760106	GSM760350	iPS_HFIB2IPS5_passage69_____Male_85	69	Male
GSE30654	GSM760025	GSM760269	ES_UC06_passage70_____Female_39	70	Female
GSE30654	GSM760007	GSM760250	ES_SIVF018_passage72_____Female_293	72	Female
GSE30654	GSM760009	GSM760252	ES_SIVF019_passage81_____Female_118	81	Female
GSE30654	GSM760011	GSM760254	ES_SIVF020_passage82_____Female_289	82	Female
GSE30654	GSM759968	GSM760207	ES_CM14_passage87_____Female_239	87	Female
GSE30654	GSM759986	GSM760227	ES_HES2_passage92_____Female_32	92	Female
GSE30654	GSM759982	GSM760223	ES_HES2_passage105_____Female_32	105	Female

## Sheet: Mallon et al Expression and 27k
Study	Expression	Methylation	Description	Passage	Gender
GSE34200	GSM815272	GSM856734	iPSC UNDIFF LINE i1 PASSAGE 12	12	Male
GSE34200	GSM815286	GSM856740	iPSC UNDIFF LINE i12 PASSAGE 14	14	Female
GSE34200	GSM815303	GSM856741	iPSC UNDIFF LINE i4 PASSAGE 14	14	Male
GSE34200	GSM815309	GSM856739	iPSC UNDIFF LINE i5 PASSAGE 21	21	Male
GSE34200	GSM815315	GSM856742	iPSC UNDIFF LINE i7 PASSAGE 21	21	Female
GSE34200	GSM815207	GSM856720	ESC UNDIFF LINE BG02 PASSAGE 54	54	Male
GSE34200	GSM815213	GSM856721	ESC UNDIFF LINE BG03 PASSAGE 54	54	Female
GSE34200	GSM815401	GSM856729	ESC UNDIFF LINE WA01 PASSAGE 56	56	Male
GSE34200	GSM815243	GSM856725	ESC UNDIFF LINE ES05 PASSAGE 59	59	Male
GSE34200	GSM815374	GSM856737	ESC UNDIFF LINE TE06 PASSAGE 60	60	Male
GSE34200	GSM815249	GSM856726	ESC UNDIFF LINE ES06 PASSAGE 62	62	Female
GSE34200	GSM815201	GSM856719	ESC UNDIFF LINE BG01 PASSAGE 67	67	Male
GSE34200	GSM815365	GSM856736	ESC UNDIFF LINE TE03 PASSAGE 70	70	Female
GSE34200	GSM815219	GSM856722	ESC UNDIFF LINE ES01 PASSAGE 71	71	Female
GSE34200	GSM815416	GSM856732	ESC UNDIFF LINE WA13 PASSAGE 76	76	Male
GSE34200	GSM815231	GSM856724	ESC UNDIFF LINE ES03 PASSAGE 88	88	Female
GSE34200	GSM815389	GSM856738	ESC UNDIFF LINE UC06 PASSAGE 114	114	Female

## Sheet: hESC With Known Passage
Study	Sample	Description	Passage
GSE6561	GSM151739	H14.s3 hsr negative rep 1	3
GSE38662	GSM947151	chHES-45-initial, biological rep1	4
GSE38662	GSM947155	chHES-51-initial,biological rep1	4
GSE38662	GSM947159	chHES-137-initial,biological rep1	4
GSE38662	GSM947163	chHES-175-initial,biological rep1	4
GSE38662	GSM1183120	chHES-22-initial, biological rep3	5
GSE38662	GSM947179	chHES-88-initial,biological rep1	5
GSE18265	GSM388636	HESC_HD129_p6	6
GSE38662	GSM947143	chHES-22-initial, biological rep1	6
GSE38662	GSM947147	chHES-26-initial, biological rep1	6
GSE38662	GSM947175	chHES-63-initial,biological rep1	6
GSE38662	GSM947187	chHES-10-initial,biological rep1	6
GSE6561	GSM151741	H14.s3 hsr negative rep 2	6
GSE38662	GSM947167	chHES-8-initial,biological rep1	7
GSE38662	GSM947171	chHES-35-initial,biological rep1	7
GSE18265	GSM388581	HESC_HD90_p8	8
GSE38662	GSM947183	chHES-127-initial,biological rep1	8
GSE7234	GSM172579	human embryonic stem cells 1	11
GSE38662	GSM947153	chHES-45-low, biological rep1	20
GSE38662	GSM947157	chHES-51-low biological rep1	20
GSE38662	GSM947165	chHES-175-low biological rep1	20
GSE38662	GSM947173	chHES-35-low biological rep1	20
GSE38662	GSM947169	chHES-8-low biological rep1	21
GSE38662	GSM947181	chHES-88-low biological rep1	21
GSE38662	GSM947189	chHES-10-low biological rep1	21
GSE38662	GSM947185	chHES-127-low biological rep1	22
GSE38662	GSM947145	chHES-22-low, biological rep1	24
GSE38662	GSM947149	chHES-26-low, biological rep1	24
GSE38662	GSM947177	chHES-63-low biological rep1	24
GSE39144	GSM956842	KhES3 p26	26
GSE38662	GSM947161	chHES-137-low biological rep1	28
GSE12390	GSM310862	HUES 8 p 30 sample 3	30
GSE9510	GSM241168	H9 hESC_20% O2 rep1	32
GSE22499	GSM574063	hES_BG01_rep3_081006_13	35
GSE24182	GSM590392	BG01 ESCs - gene expression	35
GSE9440	GSM239825	Human embryonic stem cell line T3ES, biological rep2	36
GSE9510	GSM241164	H1 hESC_20% O2 rep1	37
GSE29773	GSM738145	WIBR3-P39 replicate 1	39
GSE56906	GSM1371029	H1 p40 Und-1	40
GSE13828	GSM347921	H1L ESC	42
GSE15175	GSM378811	H1L ESC (set of 16)	42
GSE46472	GSM1130802	human ES at passage 42	42
GSE13828	GSM347924	H13B ESC	43
GSE15175	GSM378814	H13B ESC (set of 16)	43
GSE45030	GSM1096001	H9 p44	44
GSE33789	GSM835798	ESC UNDIFF LINE ES02 PASSAGE 45	45
GSE17312	GSM981283	H7 (WA07)	46
GSE22499	GSM574068	hES_H9_rep1_081006_15	49
GSE24182	GSM590391	H9 ESCs - gene expression	49
GSE9865	GSM249025	Human Embryonic Stem Cells passage 49 HSF1	49
GSE13828	GSM347923	H9 ESC	50
GSE15175	GSM378813	H9 ESC (set of 16)	50
GSE18265	GSM452691	HESC HS181p50	50
GSE33789	GSM835796	ESC UNDIFF LINE BG02 PASSAGE 50	50
GSE9510	GSM241166	H1 hESC_20% O2 rep2	50
GSE22392	GSM556994	human ES cell line (Hsf1 p51)	51
GSE45030	GSM1096008	HSF1 p51b	51
GSE33789	GSM835797	ESC UNDIFF LINE BG02 PASSAGE 54	54
GSE22392	GSM556995	human ES cell line (H1 p56)	56
GSE33789	GSM835805	ESC UNDIFF LINE WA01 PASSAGE 56	56
GSE33789	GSM835803	ESC UNDIFF LINE UC01 PASSAGE 60	60
GSE45030	GSM1095999	H1 p60	60
GSE13828	GSM347925	H14A ESC	61
GSE15175	GSM378815	H14A ESC (set of 16)	61
GSE33789	GSM835801	ESC UNDIFF LINE TE03 PASSAGE 70	70
GSE13828	GSM347922	H7 ESC	73
GSE15175	GSM378812	H7 ESC (set of 16)	73
GSE36609	GSM897490	H181 (passage 74) with bFGF	74

## Sheet: Nazor et al 450k
Study	Sample	Description	Passage
GSE30654	GSM867975	iPS__HDF51IPS6_passage5_Female____157.441.1.1	5
GSE30654	GSM867992	iPS__ChondiPS2_passage6_Male____559.1452.1.1	6
GSE30654	GSM867967	iPS__HDF51IPS1_passage6_Female____153.437.1.1	6
GSE30654	GSM867980	iPS__HDF51IPS10_passage6_Female____161.445.2.1	6
GSE30654	GSM867984	iPS__HDF51IPS12_passage6_Female____163.447.1.1	6
GSE30654	GSM867969	iPS__HDF51IPS2_passage6_Female____154.438.1.2	6
GSE30654	GSM867971	iPS__HDF51IPS3_passage6_Female____155.439.1.1	6
GSE30654	GSM867973	iPS__HDF51IPS5_passage6_Female____156.440.1.1	6
GSE30654	GSM867978	iPS__HDF51IPS9_passage7_Female____160.473.1.1	7
GSE30654	GSM867983	iPS__HDF51IPS11_passage8_Female____162.475.3.2	8
GSE30654	GSM867986	iPS__HDF51IPS13_passage8_Female____164.471.3.2	8
GSE30654	GSM867988	iPS__HDF51IPS14_passage8_Female____165.472.1.1	8
GSE30654	GSM867942	ES__SIVF050_passage9_Male____280.750.1.3	9
GSE30654	GSM867994	iPS__ChondiPS1_passage9_Male____606.1692.3.1	9
GSE30654	GSM867993	iPS__ChondiPS2_passage9_Male____559.1691.3.1	9
GSE30654	GSM867995	iPS__ChondiPS3_passage9_Male____607.1693.3.1	9
GSE30654	GSM867943	ES__SIVF043_passage12_Male____284.754.1.3	12
GSE30654	GSM867944	ES__SIVF044_passage13_Male____285.755.1.3	13
GSE30654	GSM867941	ES__CM6_passage19_Female____244.622.1.1	19
GSE30654	GSM867990	iPS__iPS414C.2_passage23_Female____510.1308.1.2	23
GSE30654	GSM867968	iPS__HDF51IPS1_passage25_Female____153.738.1.1	25
GSE30654	GSM867950	ES__MIZ6_passage27_Female____38.161.1.1	27
GSE30654	GSM867989	iPS__HDF51IPS14_passage27_Female____165.592.1.2	27
GSE30654	GSM867939	ES__CSC14_passage29_Female____197.1296.1.2	29
GSE30654	GSM867991	iPS__iPS201B7_passage31_Female____511.1312.1.2	31
GSE30654	GSM867982	iPS__HDF51IPS11_passage33_Female____162.1568.1.2	33
GSE30654	GSM867985	iPS__HDF51IPS12_passage33_Female____163.651.1.3	33
GSE30654	GSM867976	iPS__HDF51IPS6_passage33_Female____157.647.1.2	33
GSE30654	GSM867977	iPS__HDF51IPS7_passage33_Female____158.648.1.1	33
GSE30654	GSM867979	iPS__HDF51IPS9_passage33_Female____160.649.1.3	33
GSE30654	GSM867987	iPS__HDF51IPS13_passage34_Female____164.652.1.1	34
GSE30654	GSM867970	iPS__HDF51IPS2_passage34_Female____154.644.1.2	34
GSE30654	GSM867972	iPS__HDF51IPS3_passage34_Female____155.645.1.3	34
GSE30654	GSM867974	iPS__HDF51IPS5_passage34_Female____156.646.1.1	34
GSE30654	GSM867938	ES__MEL4_passage35_Female____127.378.3.1	35
GSE30654	GSM867946	ES__SIVF025_passage35_Male____296.775.1.2	35
GSE30654	GSM867952	ES__WA07_passage35_Female____47.176.1.1	35
GSE30654	GSM867981	iPS__HDF51IPS10_passage37_Female____161.900.1.2	37
GSE30654	GSM867951	ES__WA07_passage38_Female____47.1300.1.2	38
GSE30654	GSM867936	ES__WA09_passage39_Female____87.1429.1.1	39
GSE30654	GSM867937	ES__WA09_passage39_Female____87.1429.2.1	39
GSE30654	GSM867953	ES__WA09_passage39_Female____87.1429.3.1	39
GSE30654	GSM867954	ES__WA09_passage41_Female____87.304.7.1	41
GSE30654	GSM867940	ES__FES22_passage44_Male____23.93.1.1	44
GSE30654	GSM867945	ES__SIVF002_passage50_Male____290.763.1.3	50
GSE30654	GSM867949	ES__MEL1_passage51_Male____35.122.4.1	51
GSE30654	GSM867948	ES__HES4_passage57_Male____34.117.4.1	57
GSE30654	GSM867947	ES__HES2_passage105_Female____32.135.4.1	105

## Sheet: Expression Variability
Study	Sample	Description
GSE55673	GSM1341471	BJ1_iPS_1
GSE55673	GSM1341473	HF_MSC_iPS_1
GSE9865	GSM249025	HSF1
GSE9865	GSM249095	Reprogrammed clone 5 hips5
GSE9865	GSM249096	Reprogrammed clone 2 Hips2
GSE9865	GSM249137	Reprogrammed clone 7 Hips7
GSE9865	GSM249282	Human embryonic stem cell line H9
GSE12390	GSM310838	BJ hIPS #5p9 sample 1
GSE12390	GSM310845	BJ hIPS #6p9 sample 1
GSE12390	GSM310848	BJ hIPS #8p10 sample 1
GSE12390	GSM310851	BJ hIPS #12p5 sample 1
GSE13828	GSM347916	iPS SMA 3.5
GSE13828	GSM347918	iPS SMA 4.2
GSE15148	GSM378811	H1L ESC
GSE15148	GSM378812	H7 ESC
GSE15148	GSM378813	H9 ESC
GSE15148	GSM378814	H13B ESC
GSE15148	GSM378815	H14A ESC
GSE15148	GSM378822	iPS cells from episomal vectors (Defined Factor) DF19_1
GSE15148	GSM378823	iPS cells from episomal vectors (Defined Factor) DF19_2
GSE15148	GSM378824	iPS cells from episomal vectors (Defined Factor) DF19_3
GSE15148	GSM378825	iPS cells from episomal vectors (Defined Factor) DF19_4
GSE15148	GSM378826	iPS cells from episomal vectors (Defined Factor) DF19_5
GSE15148	GSM378827	iPS cells from episomal vectors (Defined Factor) DF19_6
GSE15148	GSM378828	iPS cells from episomal vectors (Defined Factor) DF19_7
GSE15148	GSM378829	iPS cells from episomal vectors (Defined Factor) DF19_8
GSE15148	GSM378830	iPS cells from episomal vectors (Defined Factor) DF19_9
GSE15148	GSM378831	iPS cells from episomal vectors (Defined Factor) DF19_10
GSE15148	GSM378834	iPS cells from episomal vectors (Defined Factor sub-clone) DF19_9_11T
GSE15148	GSM378835	iPS cells from episomal vectors (Defined Factor sub-clone) DF19_9_7T
GSE15148	GSM378836	iPS cells from episomal vectors (Defined Factor sub-clone) DF6_9_12T
GSE15148	GSM378837	iPS cells from episomal vectors (Defined Factor sub-clone) DF6_9_9T
GSE15148	GSM378838	iPS cells from episomal vectors
GSE18265	GSM388581	HESC_HD90_p8
GSE18265	GSM388636	HESC_HD129_p6
GSE18265	GSM388638	HESC_HD83_p24
GSE16654	GSM417794	mRNA_Reprogrammed iPSC line 1
GSE16654	GSM417795	mRNA_Reprogrammed iPSC line 2
GSE16694	GSM418175	CBiPS_2F_1
GSE16694	GSM418177	CBiPS 4F 1
GSE16694	GSM418181	ES2_1
GSE16654	GSM449729	CSES4
GSE16654	GSM449730	mRNA_Reprogrammed iPSC line 18
GSE18265	GSM452261	HESC HS235
GSE18265	GSM452691	HESC HS181p50
GSE18265	GSM452692	hiPS clone M4C2 p4
GSE18265	GSM452693	hiPS clone M4C10 p4
GSE18265	GSM452694	hiPS clone M5VC2 p4
GSE18618	GSM462813	iPS Clone 1_1
GSE18618	GSM462816	iPS Clone 2_1
GSE18618	GSM462819	HUES6 ES_1
GSE18618	GSM482072	Cythera ES 1
GSE20033	GSM501004	hASC-derived iPS cells using lentiviral factors replicate 1
GSE20033	GSM501007	minicircle-derived iPSC subclone 1
GSE20033	GSM501008	minicircle-derived iPSC subclone 2
GSE20033	GSM501009	minicircle-derived iPSC subclone 3
GSE22167	GSM551192	dH1F_iPS_1
GSE22167	GSM551195	PB34_iPS1_2
GSE22167	GSM551196	PB34_iPS2_1
GSE22167	GSM551198	PBMC(GH)_iPS1_1
GSE22499	GSM574061	hES_BG01_rep1_081006_9
GSE22499	GSM574066	hES_BG03_rep1_090811_5
GSE22499	GSM574068	hES_H9_rep1_081006_15
GSE22499	GSM574070	hES_WIBR1_rep1_090811_7
GSE22499	GSM574072	hES_WIBR2_rep1_090811_8
GSE22499	GSM574074	hES_WIBR3_rep1_090811_1
GSE22499	GSM574076	hES_WIBR7_rep1_090811_3
GSE22499	GSM574078	hiPS_4_rep1_081006_5
GSE22499	GSM574080	hiPS_A1_rep1_081006_1
GSE22499	GSM574082	hiPS_A6_rep1_081006_3
GSE22499	GSM574084	hiPS_C1_rep1_081006_11
GSE22499	GSM574086	hiPS_PDB1lox_17puro_10_rep1_120208_9
GSE22499	GSM574087	hiPS_PDB1lox_17puro_33_rep1_120208_10
GSE22499	GSM574088	hiPS_PDB1lox_17puro_5_rep1_120208_8
GSE22499	GSM574090	hiPS_PDB1lox_21puro_20_rep1_120208_11
GSE22499	GSM574091	hiPS_PDB1lox_21puro_26_rep1_120208_12
GSE22499	GSM574093	hiPS_PDB1lox_21puro_28_rep1_120208_1
GSE22499	GSM574094	hiPS_PDB2lox_17_rep1_120208_
GSE22499	GSM574096	hiPS_PDB2lox_21_rep1_120208_23
GSE22499	GSM574098	hiPS_PDB2lox_22_rep1_120208_25
GSE22499	GSM574099	hiPS_PDB2lox_5_rep1_120208_19
GSE23583	GSM579890	BJ_iPS_IH
GSE23583	GSM579892	dH1CF16_iPS5_IH10
GSE23583	GSM579893	dH1CF16_iPS5_IH20
GSE23583	GSM579894	dH1CF16_iPS5_IH30
GSE23583	GSM579895	dH1CF16_iPS5_IH32
GSE23583	GSM579896	MRC5_iPS2_IH
GSE23583	GSM579897	MRC5_iPS2_2_IH
GSE23583	GSM579898	H1_ES-1
GSE23583	GSM579900	H1_OGNES_IH
GSE23583	GSM579901	H9_ES-1
GSE23583	GSM579903	dH1F_RiPS_1.2
GSE23583	GSM579906	dH1F_RiPS_1.7
GSE23583	GSM579907	BJ_RiPS_1.1
GSE23583	GSM579908	BJ_RiPS_1.2
GSE23583	GSM579909	BJ_RiPS_1.3
GSE23583	GSM579910	CF_RiPS_1.2
GSE23583	GSM579911	CF_RiPS_1.3
GSE23583	GSM579912	CF_RiPS_1.4
GSE23583	GSM579913	MRC5_RiPS_1.8
GSE23583	GSM579914	MRC5_RiPS_1.9
GSE23583	GSM579915	MRC5_RiPS_1.11
GSE23968	GSM590392	BG01 ESCs - gene expression
GSE23968	GSM590397	MSC-derived iPSC line 1 - gene expression
GSE23968	GSM590398	MSC-derived iPSC line 3 - gene expression
GSE23968	GSM590403	hFib2-derived iPSC line 4 - gene expression
GSE23968	GSM590404	hFib2-derived iPSC line 5 - gene expression
GSE27186	GSM671884	cb_ips_HCB_6
GSE27186	GSM671885	kera_ips_N9
GSE27186	GSM671886	kera_ips_G5_No6
GSE29773	GSM738143	BGO1 replicate 1
GSE29773	GSM738145	WIBR3-P39 replicate 1
GSE29773	GSM738147	BGO1 SNCA A53T mutation introduced replicate 1
GSE29773	GSM738149	WIBR3 SNCA A53T mutation introduced replicate 1
GSE29773	GSM738151	PD patien- derived iPS cell carrying SNCA A53T mutation replicate 1
GSE29773	GSM738153	PD patient-derived iPS cell with SNCA A53T mutation corrected replicate 1
GSE34200	GSM835796	ESC UNDIFF LINE BG02 PASSAGE 50
GSE34200	GSM835797	ESC UNDIFF LINE BG02 PASSAGE 54
GSE34200	GSM835798	ESC UNDIFF LINE ES02 PASSAGE 45
GSE34200	GSM835799	ESC UNDIFF LINE ES02 PASSAGE 49
GSE34200	GSM835800	ESC UNDIFF LINE TE03 PASSAGE 66
GSE34200	GSM835801	ESC UNDIFF LINE TE03 PASSAGE 70
GSE34200	GSM835802	ESC UNDIFF LINE UC01 PASSAGE 56
GSE34200	GSM835803	ESC UNDIFF LINE UC01 PASSAGE 60
GSE34200	GSM835804	ESC UNDIFF LINE WA01 PASSAGE 52
GSE34200	GSM835805	ESC UNDIFF LINE WA01 PASSAGE 56

## Sheet: Methylation Variability
Study	Sample	Description
GSE42043	GSM1031158	hESC HSF6
GSE42043	GSM1031159	H1
GSE42043	GSM1031160	H9 rep1
GSE42043	GSM1031161	HSF1
GSE42043	GSM1031162	Heus7
GSE42043	GSM1031167	H9 rep2
GSE42448	GSM1040308	KhES1(p30)_undiff_hES
GSE42448	GSM1040309	KhES3(p37)_undiff_hES
GSE42448	GSM1040310	KhES4(p44)_undiff_hES
GSE42448	GSM1040311	KhES5(p47)_undiff_hES
GSE42448	GSM1040312	H1(p49)_undiff_hES
GSE42448	GSM1040313	H9(p40)_undiff_hES
GSE42448	GSM1040314	ES03(p60)_undiff_hES
GSE42448	GSM1040315	ES04(p63)_undiff_hES
GSE42448	GSM1040316	ES06(p41)_undiff_hES
GSE42448	GSM1040317	SA02(p32)_undiff_hES
GSE44296	GSM1082648	genomic DNA from ES ES
GSE51747	GSM1251961	hESC_H1_UNDIFF_p52
GSE51747	GSM1251963	hESC_H1_UNDIFF_p56
GSE51747	GSM1251968	hESC_BC1_UNDIFF_p64
GSE51747	GSM1251970	hESC_BC1_UNDIFF_p56.17 [SAMPLE_10]
GSE51747	GSM1251972	hESC_BC1_UNDIFF_p56.5.15 [SAMPLE_12]
GSE52238	GSM1261682	Human embryonic stem cell H9
GSE24676	GSM608010	HUES-2_P21
GSE24676	GSM608011	HUES-3_P29
GSE24676	GSM608012	HUES-6_P25
GSE24676	GSM608013	HUES-8_P24
GSE24676	GSM608014	HUES-9_P33
GSE25047	GSM615040	ES_1 [CH3'n]
GSE25047	GSM615041	ES_2 [CH3'n]
GSE25047	GSM615042	ES_3 [CH3'n]
GSE29872	GSM739939	H9 DNA Methylome
GSE29872	GSM739949	H1 DNA Methylome
GSE30090	GSM744663	1-hESC
GSE30090	GSM744664	2-hESC
GSE30090	GSM744665	3-hESC
GSE30090	GSM744666	4-hESC
GSE30090	GSM744667	5-hESC
GSE30090	GSM744668	6-hESC
GSE30090	GSM744669	7-hESC
GSE30090	GSM744670	8-hESC
GSE30090	GSM744671	9-hESC
GSE30090	GSM744672	10-hESC
GSE30456	GSM755488	H9 hESC cultured in human foreskin fibroblast-conditioned media
GSE30456	GSM755489	H13C hESC cultured in human foreskin fibroblast-conditioned media
GSE30456	GSM755490	SHEF2 hESC cultured in human foreskin fibroblast-conditioned media

## Sheet: Germ Cell Tumors
Study	Sample	Description
GSE18155	GSM453846	Yolk sac tumor replicate 1 of 10
GSE18155	GSM453847	Yolk sac tumor replicate 2 of 10
GSE18155	GSM453848	Yolk sac tumor replicate 3 of 10
GSE18155	GSM453849	Yolk sac tumor replicate 4 of 10
GSE18155	GSM453850	Yolk sac tumor replicate 5 of 10
GSE18155	GSM453851	Yolk sac tumor replicate 6 of 10
GSE18155	GSM453852	Yolk sac tumor replicate 7 of 10
GSE18155	GSM453853	Yolk sac tumor replicate 8 of 10
GSE18155	GSM453854	Yolk sac tumor replicate 9 of 10
GSE18155	GSM453855	Yolk sac tumor replicate 10 of 10
GSE18155	GSM453856	Seminoma replicate 1 of 6
GSE18155	GSM453857	Seminoma replicate 2 of 6
GSE18155	GSM453858	Seminoma replicate 3 of 6
GSE18155	GSM453859	Seminoma replicate 4 of 6
GSE18155	GSM453860	Seminoma replicate 5 of 6
GSE18155	GSM453862	Embryonal carcinoma replicate 1 of 1
GSE18155	GSM453863	Mature teratoma replicate 1 of 1
GSE18155	GSM453864	Normal gonadal control replicate 1 of 3
GSE18155	GSM453865	Normal gonadal control replicate 2 of 3
GSE18155	GSM453866	Normal gonadal control replicate 3 of 3
GSE18155	GSM462666	Yolk sac tumor replicate 1 of 8
GSE18155	GSM462667	Yolk sac tumor replicate 2 of 8
GSE18155	GSM462668	Yolk sac tumor replicate 3 of 8
GSE18155	GSM462669	Yolk sac tumor replicate 4 of 8
GSE18155	GSM462670	Yolk sac tumor replicate 5 of 8
GSE18155	GSM462671	Yolk sac tumor replicate 6 of 8
GSE18155	GSM462672	Yolk sac tumor replicate 7 of 8
GSE18155	GSM462673	Yolk sac tumor replicate 8 of 8
GSE18155	GSM462674	Seminoma replicate 1 of 12
GSE18155	GSM462675	Seminoma replicate 2 of 12
GSE18155	GSM462676	Seminoma replicate 3 of 12
GSE18155	GSM462677	Seminoma replicate 4 of 12
GSE18155	GSM462678	Seminoma replicate 5 of 12
GSE18155	GSM462679	Seminoma replicate 6 of 12
GSE18155	GSM462680	Seminoma replicate 7 of 12
GSE18155	GSM462681	Seminoma replicate 8 of 12
GSE18155	GSM462682	Seminoma replicate 9 of 12
GSE18155	GSM462683	Seminoma replicate 10 of 12
GSE18155	GSM462684	Seminoma replicate 11 of 12
GSE18155	GSM462685	Seminoma replicate 12 of 12
GSE18155	GSM462686	Normal gonadal control replicate 1 of 5
GSE18155	GSM462687	Normal gonadal control replicate 2 of 5
GSE18155	GSM462688	Normal gonadal control replicate 3 of 5
GSE18155	GSM462689	Normal gonadal control replicate 4 of 5
GSE18155	GSM462690	Normal gonadal control replicate 5 of 5
GSE3218	GSM72400	pure GCT (Teratoma)
GSE3218	GSM72403	pure GCT (anaplastic Seminoma)
GSE3218	GSM72409	pure GCT (Teratoma)
GSE3218	GSM72414	pure GCT (Teratoma)
GSE3218	GSM72415	pure GCT (Teratoma)
GSE3218	GSM72419	pure GCT (Teratoma)
GSE3218	GSM72420	pure GCT (Teratoma)
GSE3218	GSM72421	pure GCT (Teratoma with secondary somatic malignancy)
GSE3218	GSM72422	pure GCT (Embryonal Carcinoma)
GSE3218	GSM72426	pure GCT (Choriocarcinoma)
GSE3218	GSM72427	pure GCT (Embryonal Carcinoma)
GSE3218	GSM72433	pure GCT (Yolk Sac Tumor)
GSE3218	GSM72437	pure GCT (Teratoma)
GSE3218	GSM72443	pure GCT (Teratoma)
GSE3218	GSM72446	pure GCT (Embryonal Carcinoma)
GSE3218	GSM72448	pure GCT (Teratoma)
GSE3218	GSM72449	pure GCT (Embryonal Carcinoma)
GSE3218	GSM72451	pure GCT (Embryonal Carcinoma)
GSE3218	GSM72459	pure GCT (Embryonal Carcinoma)
GSE3218	GSM72462	pure GCT (Embryonal Carcinoma)
GSE3218	GSM72463	pure GCT (Embryonal Carcinoma)
GSE3218	GSM72470	pure GCT (Teratoma)
GSE3218	GSM72478	pure GCT (Teratoma)
GSE3218	GSM72479	pure GCT (Embryonal Carcinoma)
GSE3218	GSM72480	pure GCT (Embryonal Carcinoma)
GSE3218	GSM72482	pure GCT (Embryonal Carcinoma)
GSE3218	GSM72487	pure GCT (Teratoma)
GSE3218	GSM72488	pure GCT (Teratoma)
GSE3218	GSM72490	pure GCT (Teratoma)
GSE3218	GSM72491	pure GCT (Teratoma)
GSE3218	GSM72492	pure GCT (Choriocarcinoma)
GSE3218	GSM72493	pure GCT (Embryonal Carcinoma)
GSE3218	GSM72494	pure GCT (Embryonal Carcinoma)
GSE3218	GSM72500	normal testis
